# Supplementary material for: Prognostic evaluation of platelet to lymphocyte ratio in patients with colorectal cancer
Source: PubMed Central journal article supplement (PMC5689685; doi:10.18632/oncotarget.21141), 2017-09-21
Supplement: oncotarget-08-86287-s001.pdf [file oncotarget-08-86287-s001.pdf]

## Prognostic evaluation of platelet to lymphocyte ratio in patients with colorectal cancer

### SUPPLEMENTARY MATERIALS

**Supplementary Table 1: The five greatest c-index values of different cut-off values for PLR for predicting prognosis in CRC patients from CMU-SO**

| Survival | Cut-off | c-index | N        | Survival | Cut-off | c-index | N        |
|----------|---------|---------|----------|----------|---------|---------|----------|
| OS       | 130     | 0.5494  | 1018/827 | CSS      | 130     | 0.5553  | 1018/827 |
|          | 132     | 0.5481  | 1048/797 |          | 129     | 0.5543  | 1006/839 |
|          | 129     | 0.5481  | 1006/839 |          | 132     | 0.5539  | 1048/797 |
|          | 131     | 0.5470  | 1036/809 |          | 131     | 0.5530  | 1036/809 |
|          | 133     | 0.5462  | 1067/778 |          | 127     | 0.5525  | 978/867  |

CSS: cancer-specific survival; CMU-SO: Department of Surgical Oncology at The First Hospital of China Medical University; N: number of patients for each group; OS: overall survival; PLR: platelet to lymphocyte ratio.
